# Supplementary material for: Second-Generation Magnesium Phosphates as Water Extractant Agents in Forward Osmosis and Subsequent Use in Hydroponics
Source: MDPI journal article supplement (doi:10.3390/membranes13020226), 2023-02-13
Supplement: s1 [file s1]

*Supplementary material*

# Second-Generation Magnesium Phosphates as Water Extractant Agents in Forward Osmosis and Subsequent Use in Hydroponics

Esther Mendoza <sup>1,2,\*†</sup>, Albert Magrí <sup>3,\*†</sup>, Gaëtan Blandin <sup>3</sup>, Àlex Bayo <sup>3</sup>, Josephine Vosse <sup>1,2</sup>, Gianluigi Buttiglieri <sup>1,2</sup>, Jesús Colprim <sup>3</sup> and Joaquim Comas <sup>1,3</sup>

<sup>1</sup> ICRA-CERCA, Catalan Institute for Water Research, Emili Grahit 101, 17003 Girona, Spain

<sup>2</sup> University of Girona, Spain

<sup>3</sup> LEQUIA, Institute of the Environment, University of Girona, Campus Montilivi, Carrer Maria Aurèlia Capmany 69, 17003 Girona, Spain

\* Correspondence: emendoza@icra.cat (E.M.); albert.magri@udg.edu (A.M.)

† These authors contributed equally to this paper.

## 2. Materials and Methods

### 2.1. Magnesium Phosphates Used as Draw Solution in Forward Osmosis

**Table S1.** View of the magnesium phosphate (MgP) products used as draw solution in forward osmosis (FO).

| Ref.                         | MgP1                                                                                | MgP2                                                                                 | MgP3                                                                                  |
|------------------------------|-------------------------------------------------------------------------------------|--------------------------------------------------------------------------------------|---------------------------------------------------------------------------------------|
| XRD - Dominant mineral phase | Struvite                                                                            | Hazenite (w/ Newberyite)                                                             | Cattiite                                                                              |
| XRD diffractograms *         | 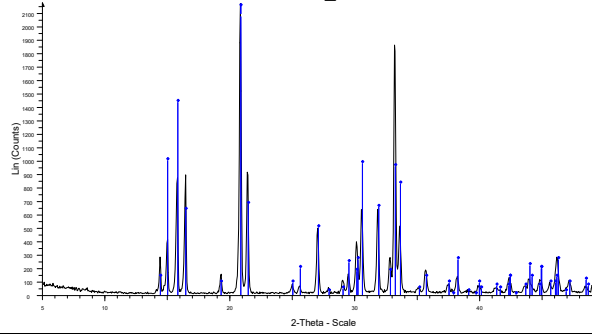  |   |   |
| View of the mineral phase    |  |  |  |

\* XRD diffractograms for hazenite and cattiite were previously published in Company, E.; Farrés, M.; Colprim, J.; Magrí, A. Exploring the recovery of potassium-rich struvite after a nitrification-denitrification process in pig slurry treatment. *Sci. Total Environ.* **2022**, *847*, 157574.

### 3. Results and Discussion

#### 3.1. Acid Dissolution of the Magnesium Phosphates

**Table S2.** TSS content after acid dissolution of the MgP salts (pH 3.0) if considering 112 g salt per liter of water as the initial dilution ratio.

| Reference | % TSS final vs. initial solids content |
|-----------|----------------------------------------|
| SC        | 1.8                                    |
| SN        | 1.5                                    |
| HC        | 1.5                                    |
| HN        | 1.2                                    |
| CC        | 1.4                                    |
| CN        | 2.5                                    |

Reference for MgP salts: S, struvite; H, hazenite; C, cattite.

Reference for acids: C, citric acid; N, nitric acid.

#### 3.2. Water Extraction and Nutrients Dilution through Forward Osmosis

##### 3.2.1. Forward Osmosis Dilution Potential

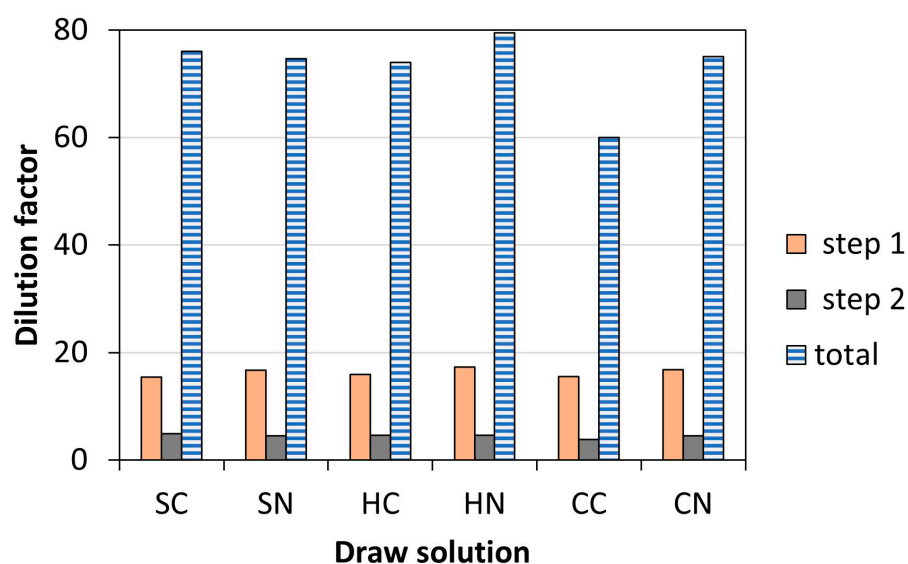

**Figure S1.** Total dilution factor achieved for the different draw solutions used in the 2-step forward osmosis (FO) process. Reference for MgP salts: S, struvite; H, hazenite; C, cattite. Reference for acids: C, citric acid; N, nitric acid.

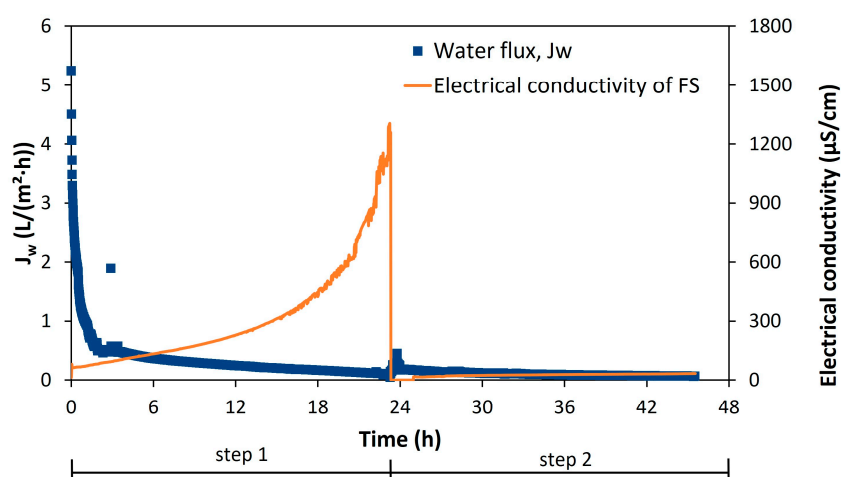

Figure S2. Filtration kinetics example (CC).

### 3.3. Hydroponic System

#### 3.3.1. Experimental Conditions

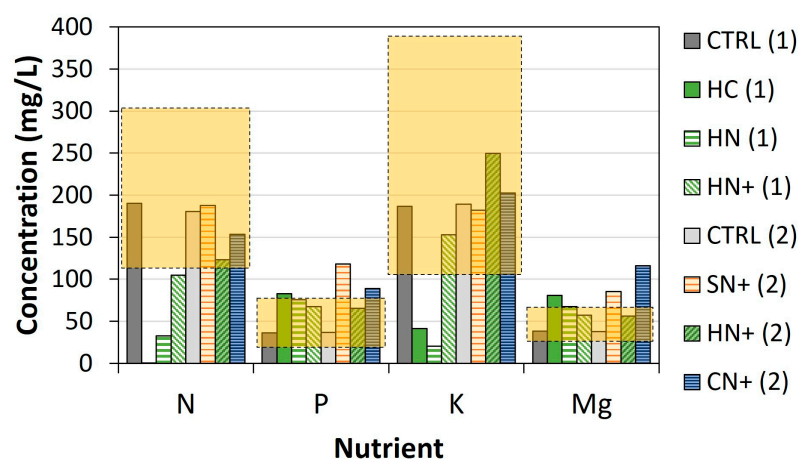

Figure S3. Nutrient concentration in the hydroponic experiments and estimated optimal ranges ( $\pm 30\%$  values from Table 2). Reference for MgP salts: S, struvite; H, hazenite; C, cattite. Reference for acids: C, citric acid; N, nitric acid. +, supplemented with  $\text{KNO}_3$ . In brackets, hydroponic experimental cycle.

#### 3.3.2. Plant Growth Analysis

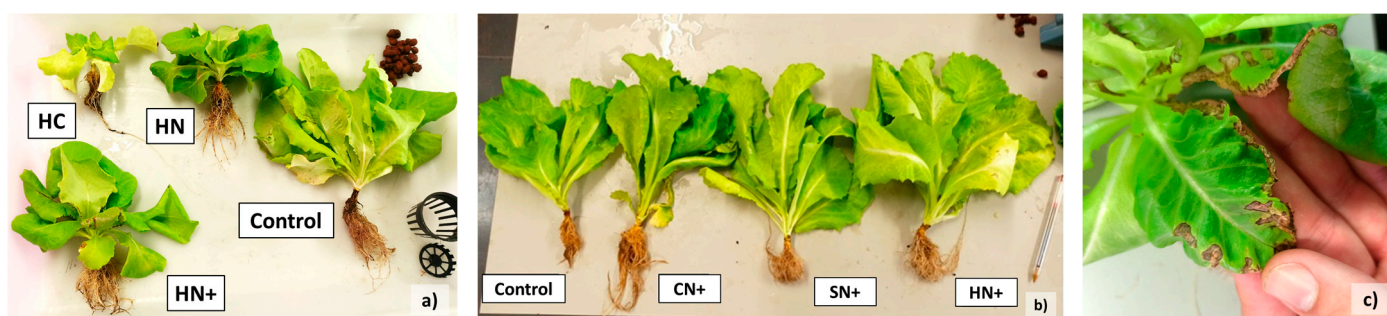

Figure S4. Pictures of the plants after 3 weeks in cycle 1 (a) and cycle 2 (b), and detail of the tipburn for HN+ condition (c).
